# Supplementary material
Source: Elsevier journal article supplement (https://www.sciencedirect.com/science/article/pii/S1885585716302742)
Supplement: mmc1 [file S1885585716302742:mmc1.pdf]

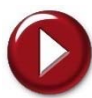

**Supplementary material**

---

## **Intravascular Ultrasound Predictors of Major Adverse Cardiovascular Events After Implantation of Everolimus-eluting Stents for Long Coronary Lesions**

---

**SUPPLEMENTARY MATERIAL****Table of the supplementary material.****The Frequency of MACE in Patients With Various Conditions of Post-intervention MLA**

|                                                                     | Prevalence | MACE     |
|---------------------------------------------------------------------|------------|----------|
| MLA < 5.0 mm <sup>2</sup>                                           | 292 (36.3) | 16 (5.5) |
| MLA < distal reference segment lumen area                           | 311 (38.7) | 15 (4.8) |
| MLA < 5.0 mm <sup>2</sup> and < distal reference segment lumen area | 171 (21.3) | 10 (5.8) |
| MLA < 5.0 mm <sup>2</sup> and ≥ distal reference segment lumen area | 121 (15.0) | 6 (5.0)  |
| MLA < 5.0 mm <sup>2</sup> or < distal reference segment lumen area  | 432 (53.7) | 21 (4.9) |
| MLA ≥ 5.0 mm <sup>2</sup> and < distal reference segment lumen area | 140 (17.4) | 5 (3.6)  |

Data are presented as n (%).

MACE, major adverse cardiovascular events; MLA, minimum lumen area.
